# Supplementary material for: Activity augmentation of a functionalized 2D conjugated polymer matrix with iron vanadate nano-bulbs for real-time detection of levofloxacin
Source: Royal Society of Chemistry journal article supplement (doi:10.1039/d4nj02548b), 2024-01-01
Supplement: d4nj02548b1.pdf [file d4nj02548b1.pdf]

## Supporting Information

### **Activity Augmentation of Functionalized 2D Conjugated Polymer Matrix with Iron Vanadate Nano-Bulbs for real-time Detection of Levofloxacin.**

Bharathi Kannan Raja, Muthukumar Govindaraj, Magesh Kumar Muthukumaran,  
Sabarikaruthapandi Ramar and Arockia Selvi J\*

Department of Chemistry, SRM Institute of Science and Technology, Kattankulathur-603203,  
Tamil Nadu, India.

**\*Corresponding author**

**Email: [arockiaj@srmist.edu.in](mailto:arockiaj@srmist.edu.in) (J. Arockia Selvi)**

**Table ST 1.**

| <b>FVO</b>    | <b>D (nm)</b> | <b><math>\partial</math> (nm<sup>-2</sup>)</b> | <b>Macrostrain percentage (%)</b> |
|---------------|---------------|------------------------------------------------|-----------------------------------|
| <b>CN</b>     | 13.35         | 0.0066                                         | 0.2451                            |
| <b>FVO</b>    | 19.49         | 0.0026                                         | 0.2422                            |
| <b>FVO/CN</b> | 10.38         | 0.0093                                         | 0.2391                            |

**Dislocation density ( $\partial$ )**

$$\partial = 1/D^2$$

**Macrostrain Percentage ( $\varepsilon$ )**

$$\varepsilon = \beta/4\tan\theta$$

**Table ST 2.**

|                    | <b>E<sub>pa</sub> (V)</b> | <b>E<sub>pc</sub> (V)</b> | <b>I<sub>pa</sub>(<math>\mu</math>A)</b> | <b>I<sub>pc</sub>(<math>\mu</math>A)</b> | <b><math>\Delta</math>E<sub>p</sub>(V)</b> | <b>R<sub>ct</sub>(<math>\Omega</math>)</b> |
|--------------------|---------------------------|---------------------------|------------------------------------------|------------------------------------------|--------------------------------------------|--------------------------------------------|
| <b>Bare GCE</b>    | 0.441                     | 0.076                     | 58.71                                    | -60.15                                   | 0.365                                      | 2581                                       |
| <b>FVO/GCE</b>     | 0.374                     | 0.143                     | 68.81                                    | -76.33                                   | 0.231                                      | 1665                                       |
| <b>CN/GCE</b>      | 0.402                     | 0.142                     | 65.6                                     | -74.51                                   | 0.260                                      | 1479                                       |
| <b>CN/FVO/GC E</b> | 0.347                     | 0.164                     | 81.96                                    | -80.29                                   | 0.183                                      | 535                                        |

**Table ST 3**

| <b>S.NO</b> | <b>Electrode</b>                             | <b>Method</b> | <b>Electrolyt e</b>                                    | <b>Linear range (<math>\mu</math>M)</b> | <b>LOD (<math>\mu</math>M)</b> | <b>Real sample</b>             | <b>Ref</b> |
|-------------|----------------------------------------------|---------------|--------------------------------------------------------|-----------------------------------------|--------------------------------|--------------------------------|------------|
| <b>1</b>    | SnO <sub>2</sub> /MWCNT/GCE                  | DPV           | 0.1M PBS (pH 6.0)                                      | 1.0-9.9                                 | 0.2                            | River water                    | <b>[1]</b> |
| <b>2</b>    | BDD electrode                                | SWV           | 0.5 M Na <sub>2</sub> SO <sub>4</sub> (pH = 5.5)       | 10-80.9                                 | 2.88                           | Urine, Blood serum             | <b>[2]</b> |
| <b>3</b>    | Co@CaPO <sub>4</sub> -modified GCE           | DPV           | 0.1M PBS                                               | 0.3- 460                                | 0.151                          | Different water samples        | <b>[3]</b> |
| <b>4</b>    | (FeCl <sub>3</sub> or Fe (III)) modified GCE | SWV           | Acetate buffer (PH 4.5)                                | 1.5-2.3                                 | 1.5                            | Urine, Blood serum and saliva  | <b>[4]</b> |
| <b>5</b>    | poly (l-cys)/AuNPs/rGO/GCE                   | DPV           | PBS (pH = 6.5)                                         | 0.001– 0.1                              | 0.3                            | Water samples                  | <b>[5]</b> |
| <b>6</b>    | poly(p-ABSA)-rGO/GCE                         | LSV           | Sodium Acetate Buffer (0.1 M, pH 4.5)                  | 2.0 – 30.0                              | 0.12                           | Urine                          | <b>[6]</b> |
| <b>7</b>    | Polypyrrole-graphene-gold nanoparticles      | DPV           | 0.2 mol L <sup>-1</sup> H <sub>2</sub> SO <sub>4</sub> | 1.0 – 100.0                             | 0.53                           | River water                    | <b>[7]</b> |
| <b>8</b>    | Au/PDDA/rGO/GCE                              | LSV           | PDDA                                                   | 10.0 – 200.0                            | 3.9                            | RNA and Pharmaceutical Samples | <b>[8]</b> |
| <b>9</b>    | Electrochemically                            | DPV           | 0.2 M                                                  | 2.812                                   | 0.84                           | Medicinal                      | <b>[9]</b> |

|           |                                                                                     |     |                                     |               |      |                      |   |
|-----------|-------------------------------------------------------------------------------------|-----|-------------------------------------|---------------|------|----------------------|---|
|           | Polymerized (EP)<br>Glycine (GN) Layered<br>Carbon Paste<br>Electrode<br>(EPGNLCPE) |     | PBS<br>30 to 90 $\mu$ M<br>(pH 7.0) |               |      | samples              |   |
| <b>10</b> | FVO/CN/GCE<br>This work                                                             | DPV | 0.1M<br>PBS<br>(pH = 7.4)           | 0.25 –<br>320 | 0.06 | Human blood<br>serum | - |

**Figure SF 1**

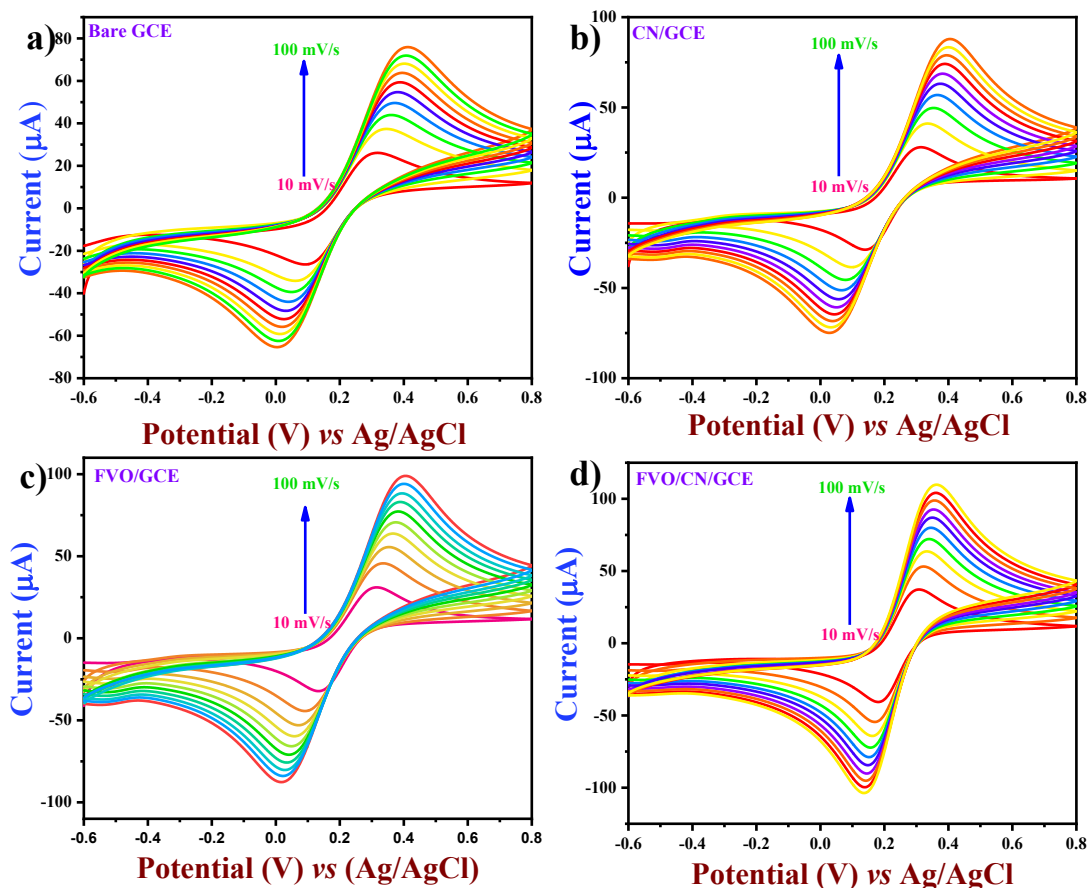

**Figure SF1 - CV's Scan Rate study of Bare GCE, CN/GCE, FVO/GCE and FVO/CN/GCE in 0.1 M KCl with 5 mM  $[\text{Fe}(\text{CN})_6]^{3-/4-}$  at a scan rate from 10 to 100 mV/s.**

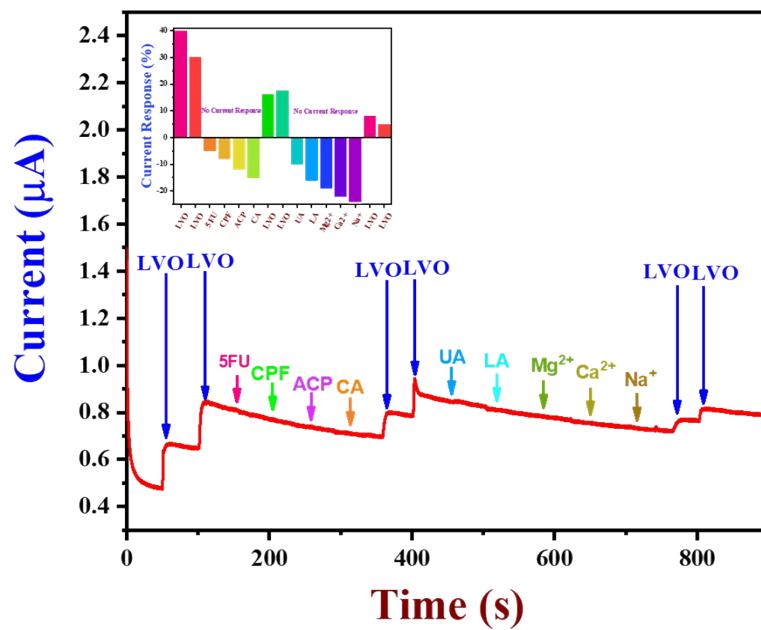

Figure SF 2

Figure SF2 – Selectivity of the FVO/CN/GCE in 0.1 M PBS with the addition of 10-fold concentration of interference molecules by amperometry technique (Rotation rate = 1000 RPM).

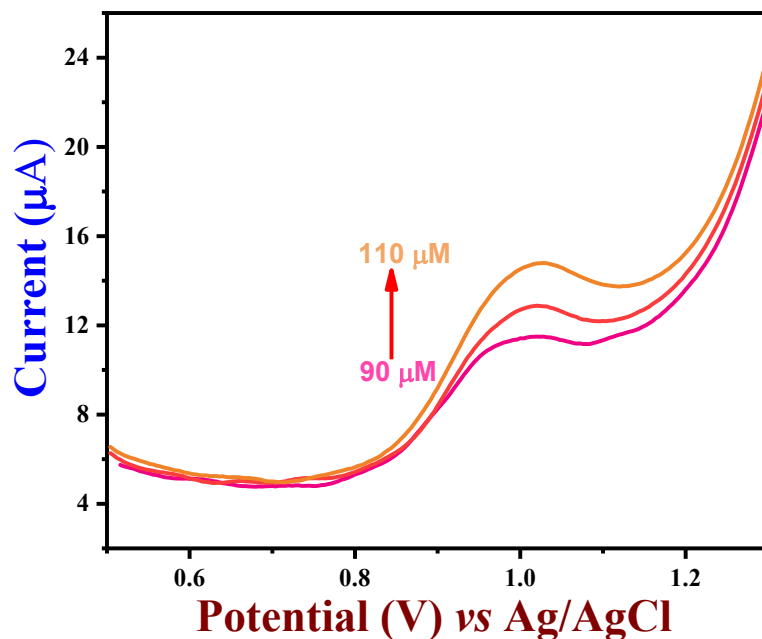

Figure SF 3

Figure SF3 – Real sample analysis of LVO with FVO/CN/GCE in human blood serum diluted with 0.1 M PBS (pH 7.4).

Figure SF4

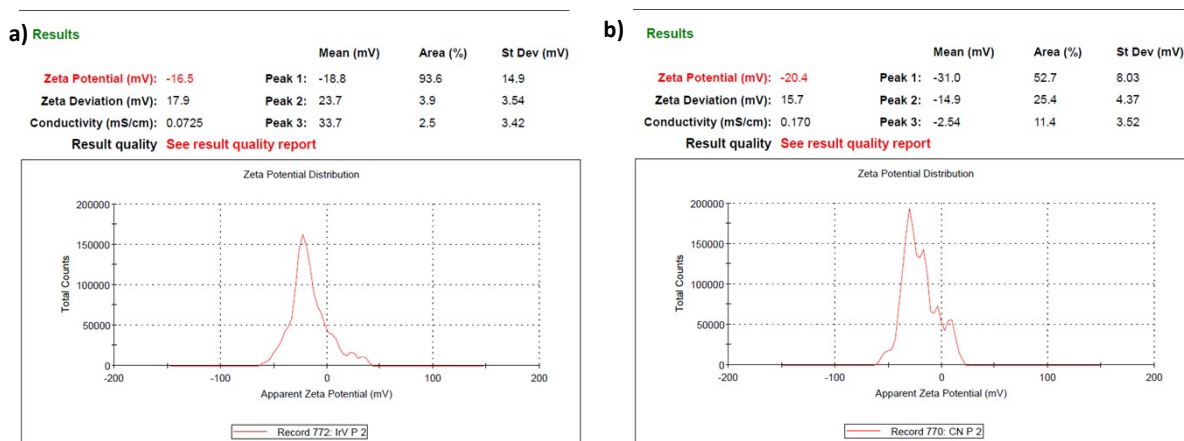

Figure SF4 – Zeta Potentials of a) FVO and b) CN.

[1] V. Cesarino, I. Cesarino, F.C. Moraes, S.A. Machado, L.H.J.J.o.t.B.C.S. Mascaro, Carbon nanotubes modified with SnO<sub>2</sub> rods for levofloxacin detection, 25 (2014) 502-508.

[2] M. Rkik, M.B. Brahim, Y.J.J.o.E.C. Samet, Electrochemical determination of levofloxacin antibiotic in biological samples using boron doped diamond electrode, 794 (2017) 175-181.

- [3] K. Alagumalai, S. Palanisamy, P.S. Kumar, N.A. ElNaker, S.-C. Kim, M. Chiesa, P.J.E.P. Prakash, Improved electrochemical detection of levofloxacin in diverse aquatic samples using 3D flower-like Co@ CaPO<sub>4</sub> nanospheres, 343 (2024) 123189.
- [4] H.R. Lotfi Zadeh Zhad, R.Y.J.E. Lai, Iron (III)-mediated Electrochemical Detection of Levofloxacin in Complex Biological Samples, 29 (2017) 2672-2677.
- [5] M.H. Ghanbari, A. Khoshroo, H. Sobati, M.R. Ganjali, M. Rahimi-Nasrabadi, F.J.M.J. Ahmadi, An electrochemical sensor based on poly (L-Cysteine)@ AuNPs@ reduced graphene oxide nanocomposite for determination of levofloxacin, 147 (2019) 198-206.
- [6] L. Han, Y. Zhao, C. Chang, F.J.J.o.E.C. Li, A novel electrochemical sensor based on poly (p-aminobenzene sulfonic acid)-reduced graphene oxide composite film for the sensitive and selective detection of levofloxacin in human urine, 817 (2018) 141-148.
- [7] F. Wang, L. Zhu, J.J.S. Zhang, A.B. Chemical, Electrochemical sensor for levofloxacin based on molecularly imprinted polypyrrole-graphene-gold nanoparticles modified electrode, 192 (2014) 642-647.
- [8] J. Borowiec, K. Yan, C.-C. Tin, J.J.J.o.T.E.S. Zhang, Synthesis of PDDA functionalized reduced graphene oxide decorated with gold nanoparticles and its electrochemical response toward levofloxacin, 162 (2015) H164.
- [9] K. Bhimaraya, J.G. Manjunatha, K.P. Moulya, A.M. Tighezza, M.D. Albaqami, M.J.C. Sillanpää, Detection of levofloxacin using a simple and green electrochemically polymerized glycine layered carbon paste electrode, 11 (2023) 191.
